# Supplementary material for: Molecular signature of response to preoperative radiotherapy in locally advanced breast cancer
Source: PubMed Central journal article supplement (PMC6167820; doi:10.1186/s13014-018-1129-4), 2018-10-01

# Supplementary Figure 1

A

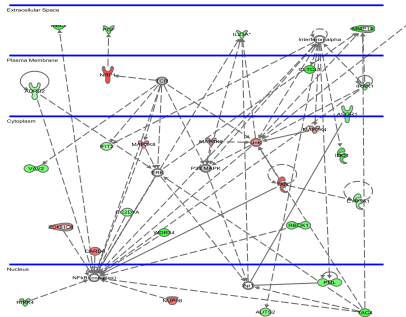

B

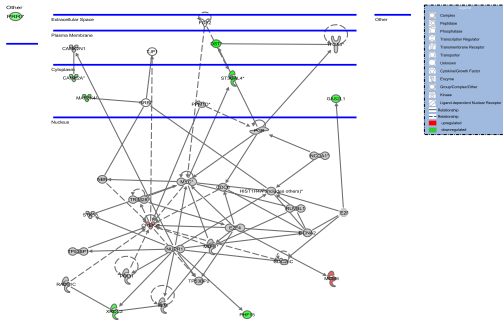

Supplement: 13014_2018_1129_MOESM3_ESM.pdf [file 13014_2018_1129_MOESM3_ESM.pdf]
